# Supplementary material for: Grimmite, NiCo&lt;sub&gt;2&lt;/sub&gt;S&lt;sub&gt;4&lt;/sub&gt;, a new thiospinel from Příbram, Czech Republic
Source: Copernicus journal article supplement (doi:10.5194/ejm-33-175-2021), 2021-04-19
Supplement: Supplementary file 1 [file ejm-33-175-2021-supplement.zip]

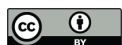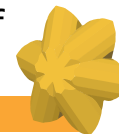

*Supplement of*

## **Grimmite, $\text{NiCo}_2\text{S}_4$ , a new thiospinel from Příbram, Czech Republic**

**Pavel Škácha et al.**

*Correspondence to:* Pavel Škácha (skachap@seznam.cz)

- [ejm-33-175-2021-supplement-title-page.pdf](#)
- [grimmite.cif](#)

The copyright of individual parts of the supplement might differ from the article licence.
